# Supplementary material
Source: PubMed Central journal article supplement (PMC3162449)
Supplement: supp_M111.253500_jbc.M111.253500-1.pdf [file supp_M111.253500_jbc.M111.253500-1.pdf]

# Supplementary Figure 1

A.

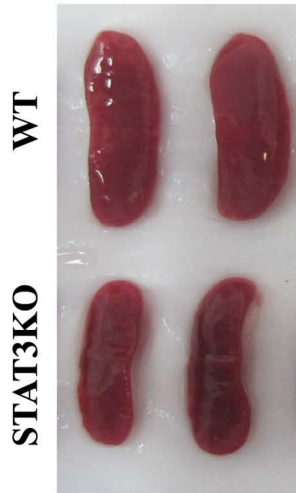

B.

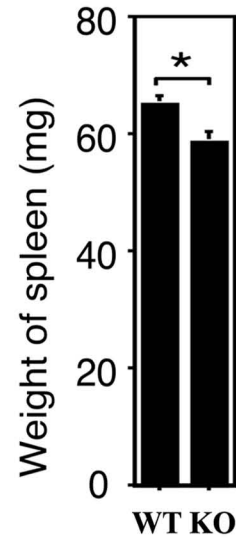

C.

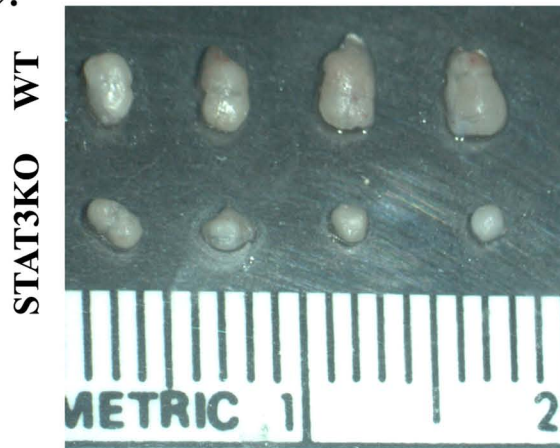

D.

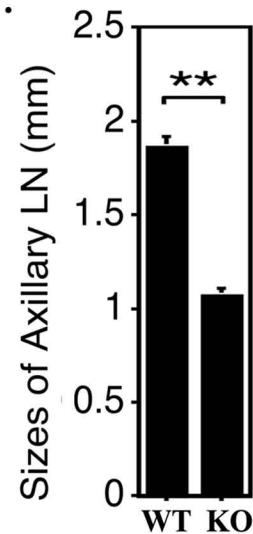

Eight week old STAT3KO (conditional deletion of STAT3 in CD4 T cell compartment) and wild type C57BL/6 littermate mice were euthanized. Spleen and lymph nodes (LN) were harvested and pictures and graphs illustrating differences in weight and size of these tissues in the two mouse strains are depicted.
